# Supplementary material for: Cellular Responses in Human Dental Pulp Stem Cells Treated with Three Endodontic Materials
Source: Hindawi journal article supplement (doi:10.1155/2017/8920356), 2017-01-01
Supplement: f1 [file 8920356.f1.pdf]

**Table S1.** Composition of MTA-Angelus White (Angelus, Londrina, PR, Brazil), AH-Plus (Dentsply De Trey, Konstanz, Germany), and MTA-Fillapex (Angelus, Londrina, PR, Brazil).

| Endodontic material | Chemical composition                        | Percentage        |
|---------------------|---------------------------------------------|-------------------|
| MTA-Angelus         | Tri-calcium silicate                        | 51%               |
|                     | Di-calcium silicate                         | 10%               |
|                     | Tri-calcium aluminate                       | 11%               |
|                     | Ferroaluminate tri-calcium                  | 3%                |
|                     | Calcium oxide                               | 5%                |
|                     | Bismuth oxide                               | 20%               |
| AH-Plus             | <b>Chemical composition</b>                 | <b>Percentage</b> |
|                     | <b>Paste A</b>                              |                   |
|                     | Bisphenol-A epoxy resin                     | 25-50%            |
|                     | Bisphenol-F epoxy resin                     | 2.5-10%           |
|                     | Calcium tungstenate                         | 40-72.5%          |
|                     | Zirconium oxide                             |                   |
|                     | Silica                                      |                   |
|                     | Iron oxide                                  |                   |
|                     | <b>Paste B</b>                              |                   |
|                     | Dibenzyl-diamine                            | 10-25%            |
|                     | Aminoadamantane                             | 2.5-10%           |
|                     | Tri-cyclodecane diamine                     | 65-87.5%          |
|                     | Calcium tungstenate                         |                   |
|                     | Zirconium oxide                             |                   |
|                     | Silica                                      |                   |
|                     | Silicone oil                                |                   |
| MTA-Fillapex        | <b>Chemical composition</b>                 | <b>Percentage</b> |
|                     | <b>Paste A</b>                              |                   |
|                     | Methyl salicylate butylene glycol colophony | 44%               |
|                     | Bismuth trioxide                            | 35%               |
|                     | Fumed silicon dioxide                       | 5%                |
|                     | Titanium dioxide                            | 16%               |
|                     | <b>Paste B</b>                              |                   |
|                     | MTA                                         | 44%               |
|                     | Pentaerythritol rosinate                    | 47%               |
|                     | Fumed silicon dioxide                       | 6%                |
|                     | Titanium dioxide                            | 3%                |
